# Supplementary material for: Simultaneous fast XAS/SAXS measurements in an energy-dispersive mode
Source: Royal Society of Chemistry journal article supplement (doi:10.1039/d4cp01399a), 2024-01-01
Supplement: d4cp01399a1.pdf [file d4cp01399a1.pdf]

## *Electronic Supplementary Information*

# **Simultaneous fast XAS/SAXS measurements in an energy-dispersive mode**

Tetsuroh Shirasawa,<sup>\*,†</sup> Wolfgang Voegeli,<sup>‡</sup> and Etsuo Arakawa<sup>‡</sup>

<sup>†</sup>*Research Institute for Material and Chemical Measurement, National Institute of Advanced Industrial Science and Technology (AIST), Tsukuba, Ibaraki 305-8565, Japan.*

<sup>‡</sup>*Natural Sciences Division, Tokyo Gakugei University, Koganei, Tokyo 184-8501, Japan.*

E-mail: t.shirasawa@aist.go.jp

## **Contents**

- SAXS intensity calculation for Pt@Pd and Pt nanoparticles.
- EXAFS analysis for Pt@Pd and Pt nanoparticles.
- Figure S1: ED-XAS and energy-scan XAS data of a Pt foil reference sample.
- Figure S2: ED-XAS/SAXS data of Pt nanoparticles.
- Figure S3: Monochromatic SAXS data of the Pt and Pt@Pd nanoparticles.
- Figure S4: Fourier transforms of the EXAFS data of the Pt and Pt@Pd nanoparticles.
- Table S1: Structure parameters of the Pt nanoparticles obtained by EXAFS analysis.
- Table S2: Structure parameters of the Pt nanoparticles obtained by SAXS analysis.

## SAXS intensity calculation for Pt@Pd and Pt nanoparticles

The SAXS intensity of the Pt@Pd nanoparticle for an X-ray energy  $E$  and scattering vector  $\mathbf{q}$  was calculated based on the following equation:<sup>1,2</sup>

$$I_{\text{SAXS}}(E, q) = \Phi(E)[Bq^{-d} + \int D(r)A_{\text{sph}}(E, q, r)A_{\text{sph}}^*(E, q, r)dr], \quad (\text{S1})$$

where  $q = |\mathbf{q}|$ ,  $\Phi(E)$  is the flux of the incident X-ray component, the power law factor  $Bq^{-d}$  with free parameters of  $B$  and  $d$  describes the scattering from the polydisperse carbon support and boron nitride particles, and  $A_{\text{sph}}(E, q, r)$  and  $A_{\text{sph}}^*(E, q, r)$  are the scattering amplitude of the spherical nanoparticle and its complex conjugate, respectively.  $r$  is the particle radius and  $D(r)$  is the Schultz-Zimm distribution function

$$D(r) = \frac{\left(\frac{z+1}{r_0}\right)^{z+1} r^z}{\Gamma(z+1)} \exp\left(-\frac{z+1}{r_0} r\right), \quad (\text{S2})$$

where  $z = (r_0/\sigma)^2 - 1$  and  $r_0$  and  $\sigma$  are the average radius and root mean square (RMS) deviation of the size distribution, respectively. The scattering amplitude of the core-shell particle is

$$\begin{aligned} A_{\text{sph}}(E, q, r) = & V(r)n_{\text{Pt}}f_{\text{Pt}}(E, q)[F(q, r) - F(q, r - t_{\text{shell}})] \\ & + V(r)n_{\text{Pd}}f_{\text{Pd}}(q)F(q, r - t_{\text{shell}}), \end{aligned} \quad (\text{S3})$$

where  $V(r) = 4\pi r^3/3$  is the volume of the spherical particle and  $n_{\text{Pt}}$  ( $n_{\text{Pd}}$ ) and  $f_{\text{Pt}}$  ( $f_{\text{Pd}}$ ) are the number density and scattering factor of Pt (Pd) atom, respectively. In the analysis,  $n_{\text{Pt}} = 4/(0.392)^3 \text{ nm}^{-3}$  and  $n_{\text{Pd}} = 4/(0.389)^3 \text{ nm}^{-3}$  were used according to the Pt and Pd bulk crystals.  $t_{\text{shell}}$  is the shell thickness and thus  $r - t_{\text{shell}}$  corresponds to the core radius  $r_{\text{core}}$ .  $F(q, r)$  is the form factor of a spherical structure,

$$F(q, r) = \frac{3[\sin(qr) - qr \cos(qr)]}{(qr)^3}. \quad (\text{S4})$$

In equation S3, the first term denotes the energy-dependent scattering amplitude from Pt constituting the shell and the second term denotes the non-resonant scattering amplitude from Pd constituting the core. The overall intensity recorded at a detector position  $P$  is the sum of SAXS intensities from all the X-ray components,  $I_P = \sum_j T(E_j)I_{\text{SAXS}}(E_j, \mathbf{q}_{Pj})$ , where  $T(E_j)$  is the transmittance for an X-ray energy of  $E_j$ , as mentioned in the main text. The intensities at the detector pixels were calculated to reproduce the experimental ED-SAXS image, using the anomalous scattering factors of Pt obtained from the ED-XAS data and the incident flux and the direction of each X-ray component obtained from the incident X-ray spectrum measurements. For the analysis of the Pt nanoparticles, the scattering amplitude of a uniform Pt sphere was used ( $r = t_{\text{shell}}$  in eq. S3). The fits to the ED-SAXS and SAXS data were performed using a least-squares method with a homemade software. Optimized values of the fitting parameters of the Pt@Pd and Pt nano particles are shown in Tables 2 and S2, respectively.

## EXAFS analysis for Pt@Pd and Pt nanoparticles

The EXAFS analysis was performed using Athena/Artemis software of the Demeter package.<sup>3</sup> For the analysis,  $k^2$ -weighted EXAFS spectra were Fourier transformed to  $R$ -space with Hanning window functions, where the  $k$ -ranges were 3.0–10.0  $\text{\AA}^{-1}$  and 3.0–10.5  $\text{\AA}^{-1}$  for the Pt@Pd and Pt nanoparticles, respectively. The FEFF 6.0 was used for the calculation of scattering paths. In addition to Pt–Pt or Pt–Pd paths, we assumed a Pt–O path taking account of a possible oxidation of Pt, because the measurements were performed more than 6 months after the sample synthesis and no oxide reduction treatment was performed before the experiments. For the Pt@Pd nanoparticles, the nearest neighbor Pt–Pt and Pt–Pd derived from a Pt crystal structure and the nearest neighbor Pt–O derived from an  $\alpha$ -PtO<sub>2</sub> crystal were used as the scattering paths. For the Pt nanoparticles, the nearest neighbor Pt–Pt derived from the Pt crystal and the nearest neighbor Pt–O and Pt–Pt in the  $\alpha$ -PtO<sub>2</sub> crystal were used as the scattering paths, referring to a previous EXAFS analysis for an ini-

tial oxidation of Pt nanoparticles.<sup>4</sup> The bond distances  $d$ , the coordination numbers (CN), and mean square variation in the scattering path length  $\sigma^2$  were used as the fitting parameters. We used a common  $\sigma^2$  for all the scattering paths in order to reduce the number of fitting parameters. The fits were done in  $R$ -space, and the ranges of  $R$ -space were 1.3–3.1 Å and 1.3–3.5 Å for the Pt@Pd and Pt nanoparticles, respectively.

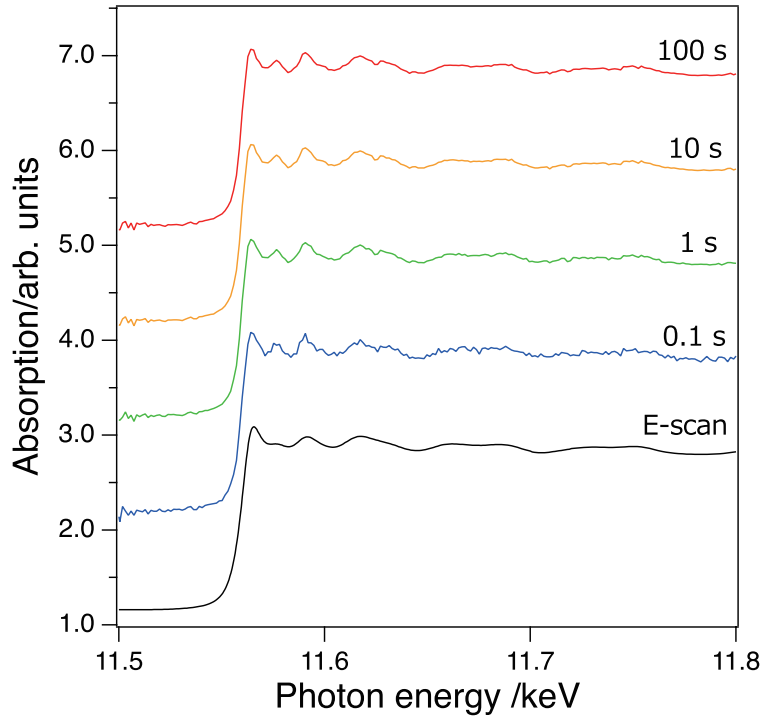

Figure S1: ED-XAS and energy-scan XAS spectra of a Pt foil reference sample (thickness: 7.5  $\mu\text{m}$ ).

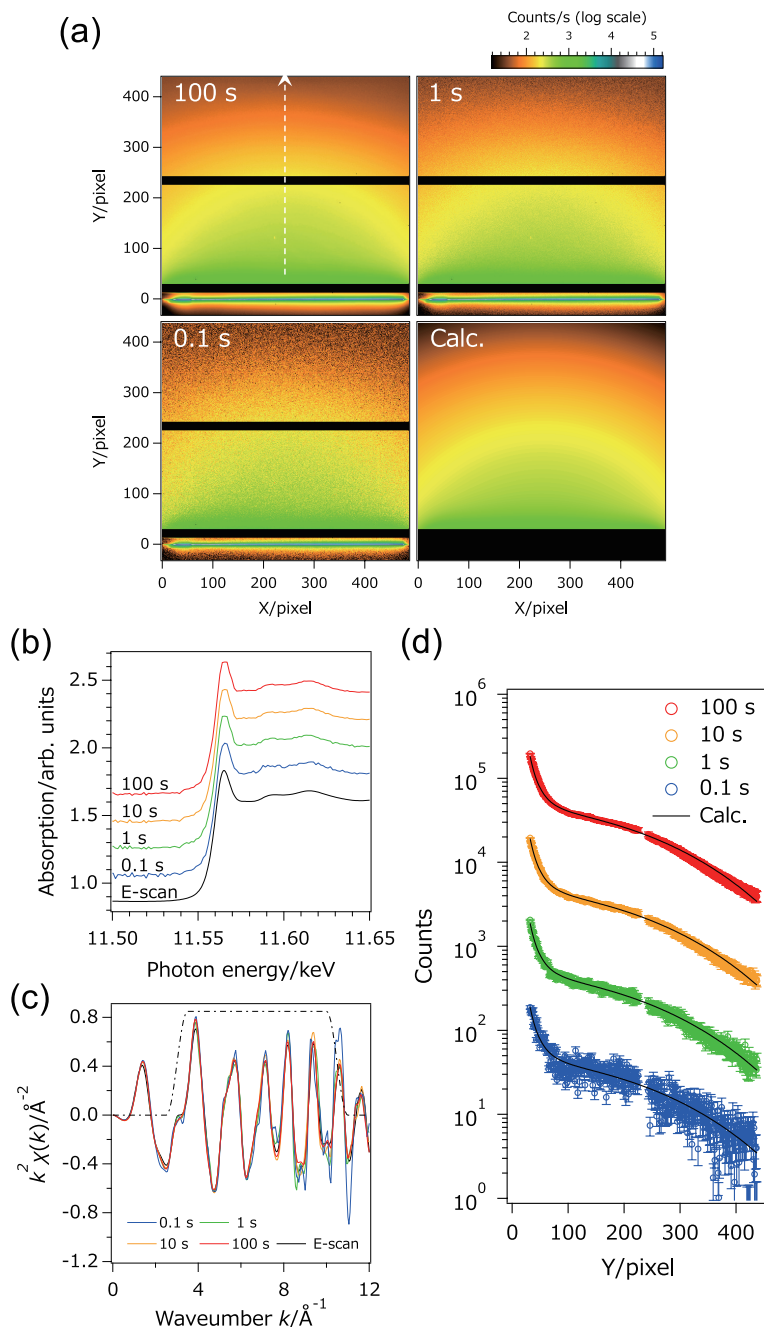

Figure S2: ED-XAS/SAXS data of Pt nanoparticles. The Pt nanoparticles (8.3 wt.% Pt) were supported by carbon black (8.3 wt.%) and mixed with boron nitride powder (83.4 wt.%, particle size  $\sim 1 \mu\text{m}$ ) to be shaped into a pellet (diameter: 7 mm and thickness: 0.5 mm). (a) The ED-XAS/SAXS images with data acquisition times of 100 s, 1 s, and 0.1 s and the calculated ED-SAXS image fitted to the experimental data of 0.1 s. (b) XANES spectra and (c)  $k^2$ -weighted EXAFS spectra of the Pt nanoparticles, obtained by the ED-XAS measurements with different exposure times and the conventional energy-scan measurements. Dashed-dotted line in (c) represents a Hanning window function used for the Fourier transform of the EXAFS spectra into  $R$ -space (see Fig. S4(b)). (d) The ED-SAXS intensities along the dashed arrow in (a) and calculated ones for the structure parameters obtained from a monochromatic SAXS data (see Table S2).

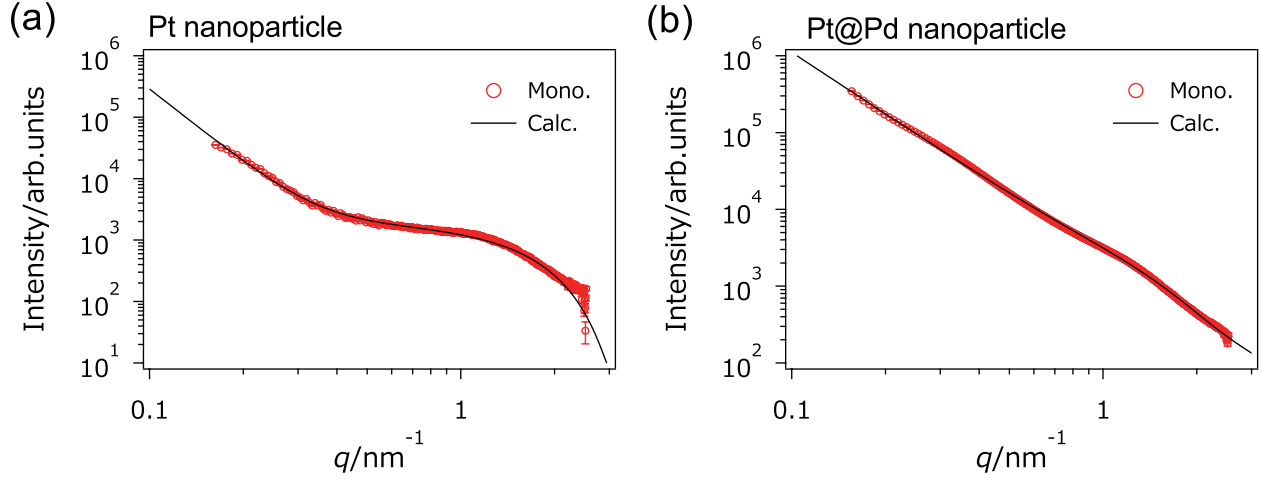

Figure S3: Monochromatic SAXS data of (a) Pt nanoparticles and (b) Pt@Pd nanoparticles.

Table S1: Best-fit structure parameters of the Pt nanoparticles obtained from the EXAFS analysis for the ED-XAS data with different exposure times and for the energy-scan XAS data.

| data   | $d_{\text{Pt-Pt}}/\text{\AA}$ | $d_{\text{Pt-Pt(PtO}_2\text{)}}/\text{\AA}$ | $d_{\text{Pt-O}}/\text{\AA}$ | $\text{CN}_{\text{Pt-Pt}}$ | $\text{CN}_{\text{Pt-Pt(PtO}_2\text{)}}$ | $\text{CN}_{\text{Pt-O}}$ | $\sigma^2/\text{\AA}^2$ |
|--------|-------------------------------|---------------------------------------------|------------------------------|----------------------------|------------------------------------------|---------------------------|-------------------------|
| E-scan | $2.76 \pm 0.02$               | $3.11 \pm 0.05$                             | $1.99 \pm 0.02$              | $7.0 \pm 1.4$              | $0.9 \pm 0.5$                            | $1.9 \pm 0.4$             | $0.005 \pm 0.002$       |
| 100 s  | $2.75 \pm 0.02$               | $3.10 \pm 0.05$                             | $1.99 \pm 0.02$              | $7.4 \pm 1.6$              | $1.0 \pm 0.6$                            | $2.0 \pm 0.5$             | $0.005 \pm 0.002$       |
| 10 s   | $2.76 \pm 0.02$               | $3.11 \pm 0.04$                             | $1.99 \pm 0.02$              | $7.2 \pm 1.6$              | $1.1 \pm 0.6$                            | $2.1 \pm 0.6$             | $0.005 \pm 0.003$       |
| 1 s    | $2.76 \pm 0.01$               | $3.08 \pm 0.05$                             | $1.99 \pm 0.02$              | $6.7 \pm 1.5$              | $0.8 \pm 0.5$                            | $1.8 \pm 0.4$             | $0.004 \pm 0.002$       |
| 0.1 s  | $2.76 \pm 0.01$               | $3.09 \pm 0.04$                             | $1.99 \pm 0.02$              | $6.7 \pm 1.3$              | $0.9 \pm 0.5$                            | $2.0 \pm 0.4$             | $0.004 \pm 0.002$       |

Table S2: Best-fit structure parameters of the Pt nanoparticles obtained from the ED-SAXS and monochromatic SAXS data.

| data  | $r/\text{nm}$   | $\sigma_{\text{RMS}}/\text{nm}$ |
|-------|-----------------|---------------------------------|
| Mono. | $1.40 \pm 0.02$ | $0.12 \pm 0.02$                 |
| 100 s | $1.40 \pm 0.02$ | $0.13 \pm 0.03$                 |
| 10 s  | $1.40 \pm 0.02$ | $0.13 \pm 0.03$                 |
| 1 s   | $1.40 \pm 0.03$ | $0.14 \pm 0.03$                 |
| 0.1 s | $1.40 \pm 0.05$ | $0.12 \pm 0.03$                 |

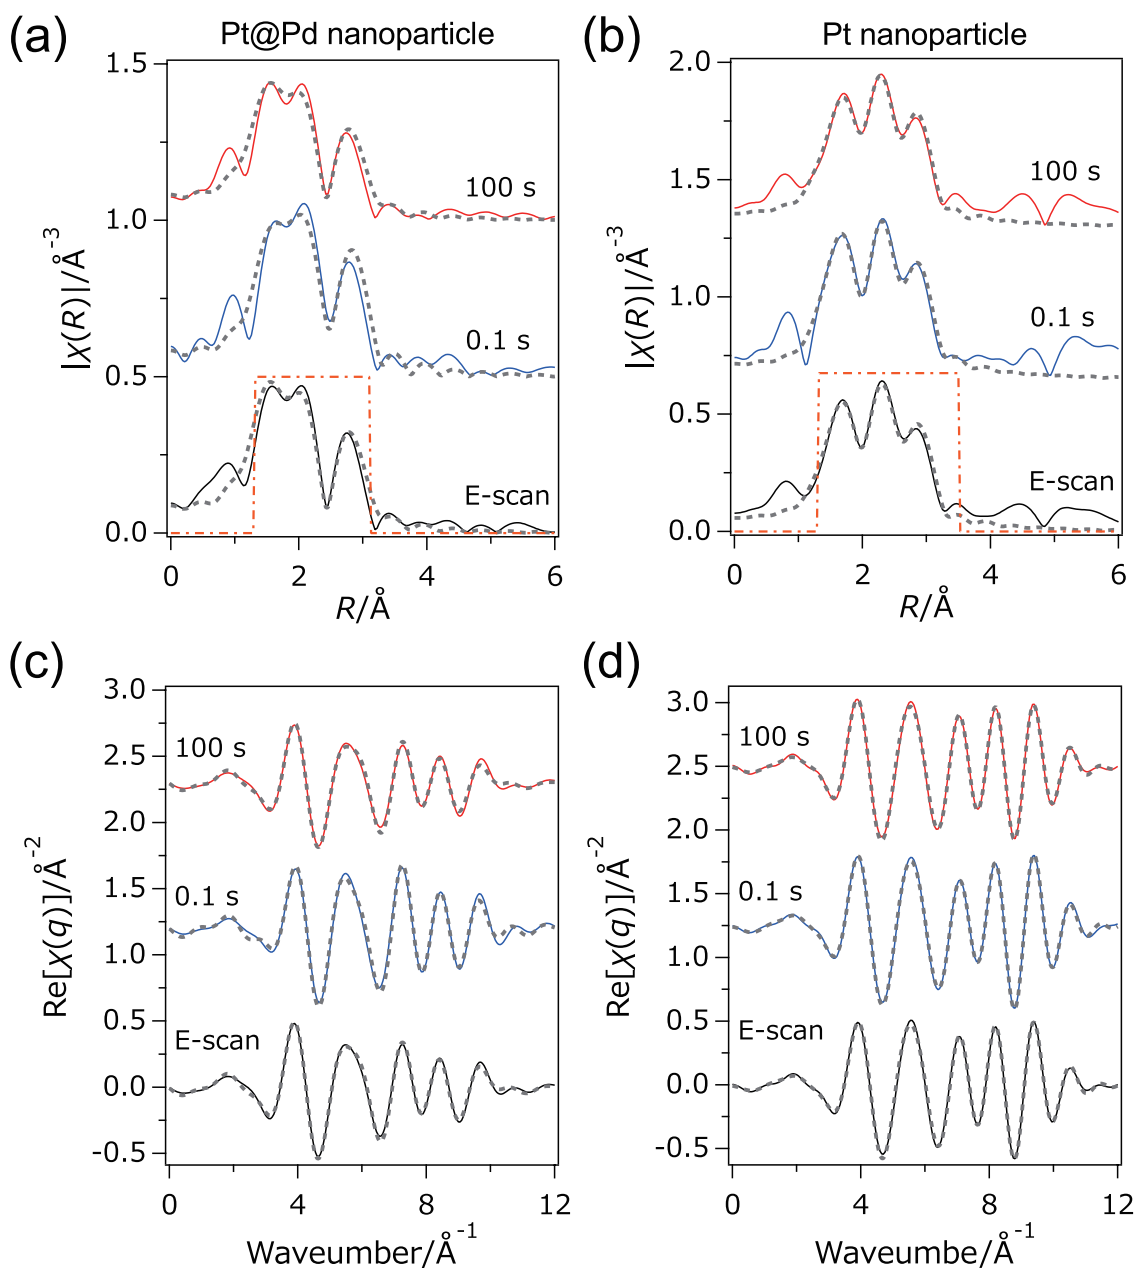

Figure S4: (a) and (b) Amplitudes of the Fourier transform of the  $k^2$ -weighted EXAFS spectra of the Pt@Pd and Pt nanoparticles, respectively. Dashed lines are the calculated amplitudes. Dashed-dotted windows represent the data range used in the EXAFS fitting. (c) and (d) Real part of the inverse Fourier transform of the window ranges of (a) and (b), respectively.

## References

- (1) Alinejad, S.; Quinson, J.; Schröder, J.; Kirkensgaard, J. J. K.; Arenz, M. Carbon-Supported Platinum Electrocatalysts Probed in a Gas Diffusion Setup with Alkaline Environment: How Particle Size and Mesoscopic Environment Influence the Degradation Mechanism. *ACS Catalysis* **2020**, *10*, 13040–13049.
- (2) Li, T.; Senesi, A. J.; Lee, B. Small Angle X-ray Scattering for Nanoparticle Research. *Chemical Reviews* **2016**, *116*, 11128–11180.
- (3) Ravel, B.; Newville, M. *ATHENA, ARTEMIS, HEPHAESTUS*: data analysis for X-ray absorption spectroscopy using *IFEFFIT*. *Journal of Synchrotron Radiation* **2005**, *12*, 537–541.
- (4) Imai, H.; Izumi, K.; Matsumoto, M.; Kubo, Y.; Kato, K.; Imai, Y. In Situ and Real-Time Monitoring of Oxide Growth in a Few Monolayers at Surfaces of Platinum Nanoparticles in Aqueous Media. *Journal of the American Chemical Society* **2009**, *131*, 6293–6300.
